# Supplementary material
Source: PubMed Central journal article supplement (PMC3886672)

# Supporting Information

for

## Highly Sensitive Method for Analysis of 7-Dehydrocholesterol for the Study of Smith-Lemli-Opitz Syndrome (SLOS)

Wei Liu<sup>1</sup>, Libin Xu,<sup>1</sup> Connor Lamberson,<sup>1</sup> Dorothea Haas,<sup>3</sup> Zeljka Korade<sup>2</sup>, and Ned A. Porter<sup>1,2\*</sup>

<sup>1</sup>Department of Chemistry, Vanderbilt Institute of Chemical Biology, <sup>2</sup>Department of Psychiatry, Vanderbilt Kennedy Center for Research on Human Development, Vanderbilt University, Nashville, Tennessee 37235. <sup>3</sup>University Children's Hospital, Division of Inborn Metabolic Diseases, Im Neuenheimer Feld 430, D-69120 Heidelberg, Germany

**Figure S-1:** Standard curves for LC-MS/MS analysis of desmosterol PTAD products. Different amounts of desmosterol (ranging from 10 ng to 2000 ng, with 25 ng of *d*<sub>7</sub>-7DHC internal standard) were added for the PTAD incubations, respectively, and 10 μL of each reaction mixture was injected.

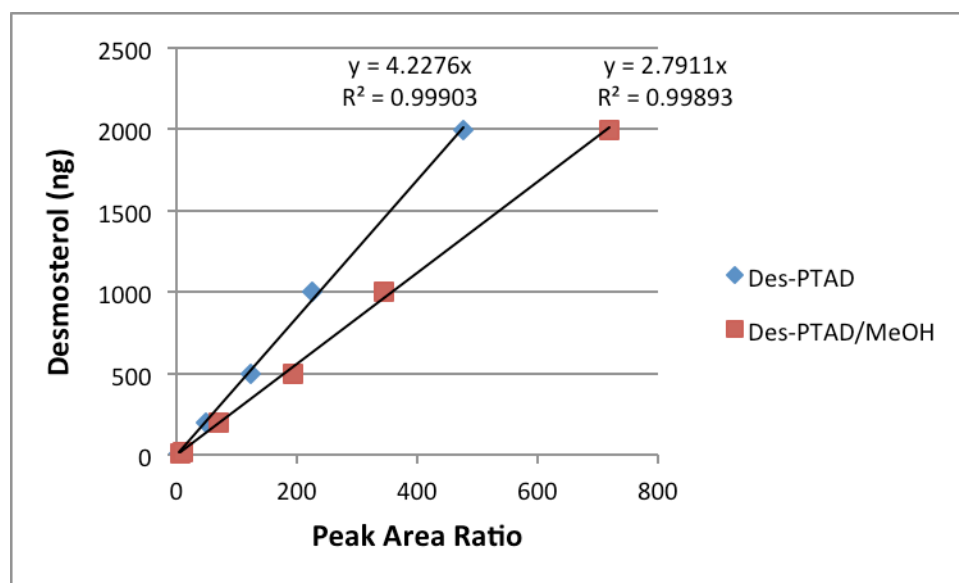

**Figure S-2:** MS and NMR for desmosterol-PTAD derivatives

ene product **Des-PTAD:**

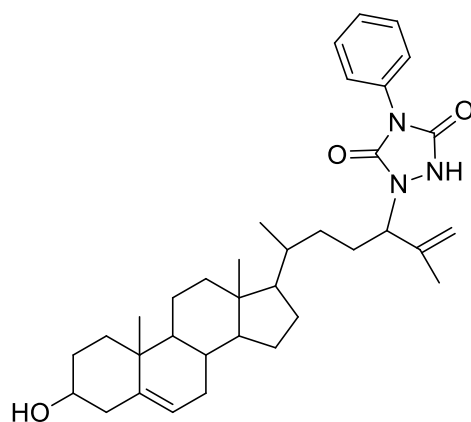

Exact Mass: 559.38

MS<sup>1</sup>:

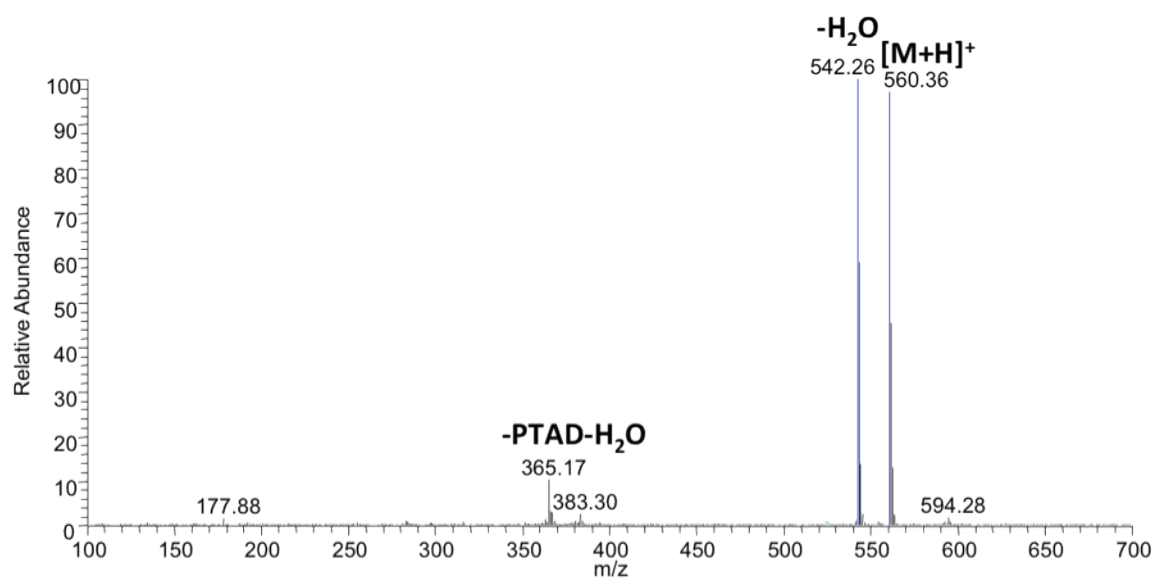



$^{13}\text{C}$  NMR:

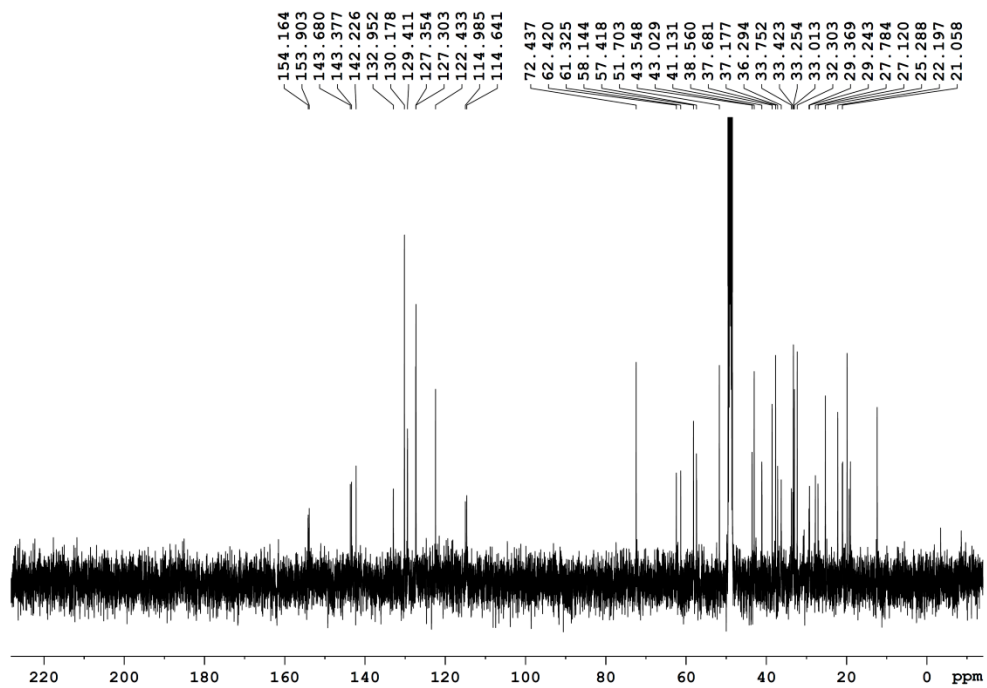

COSY:

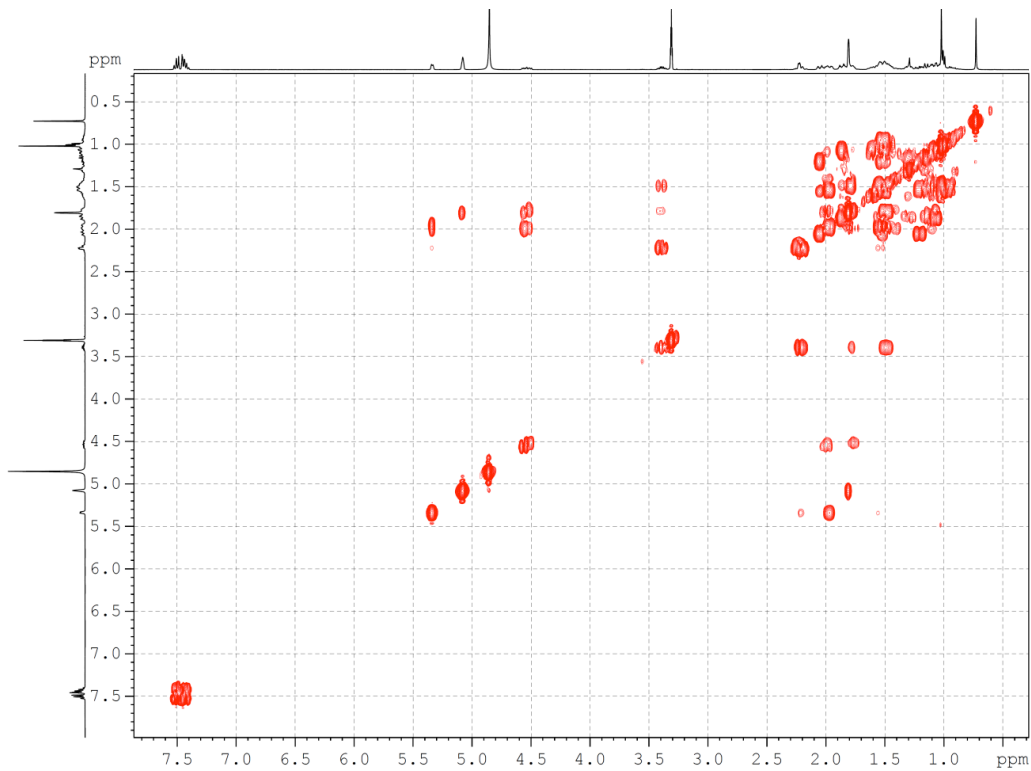

HMBC:

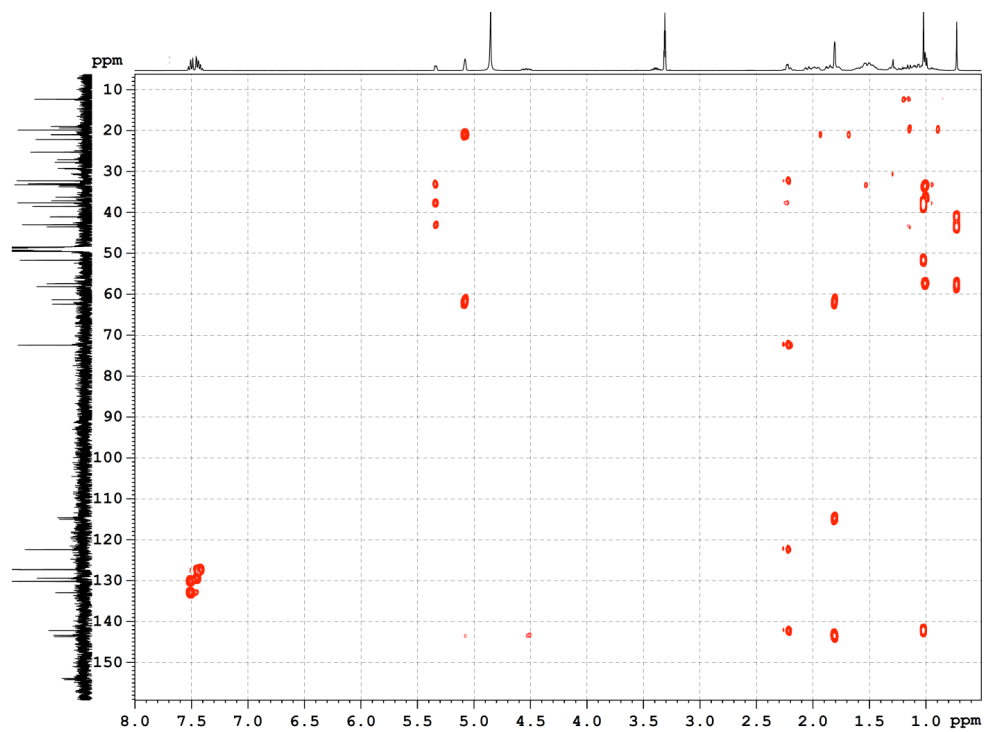

HSQC:

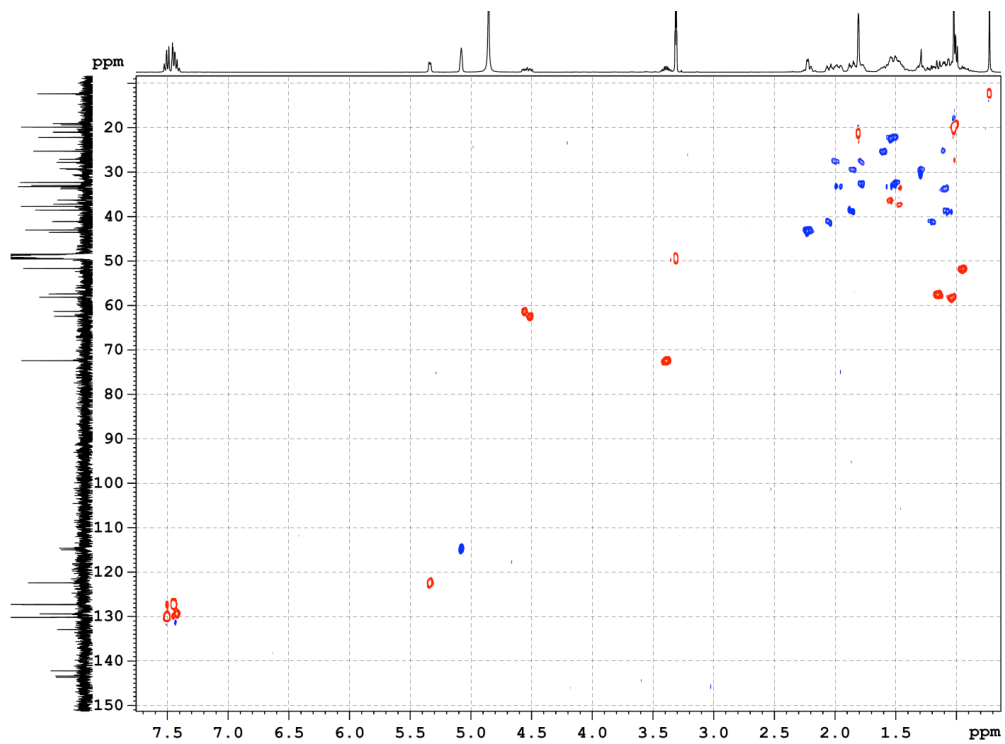

**Figure S-3:** MS and NMR for desmosterol-PTAD derivatives

solvent addition product **Des-PTAD/MeOH:**

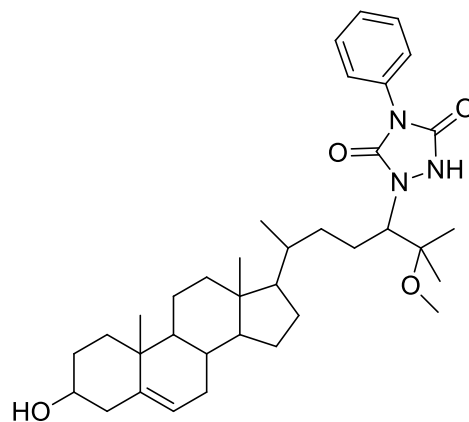

Exact Mass: 591.40

MS<sup>1</sup>:

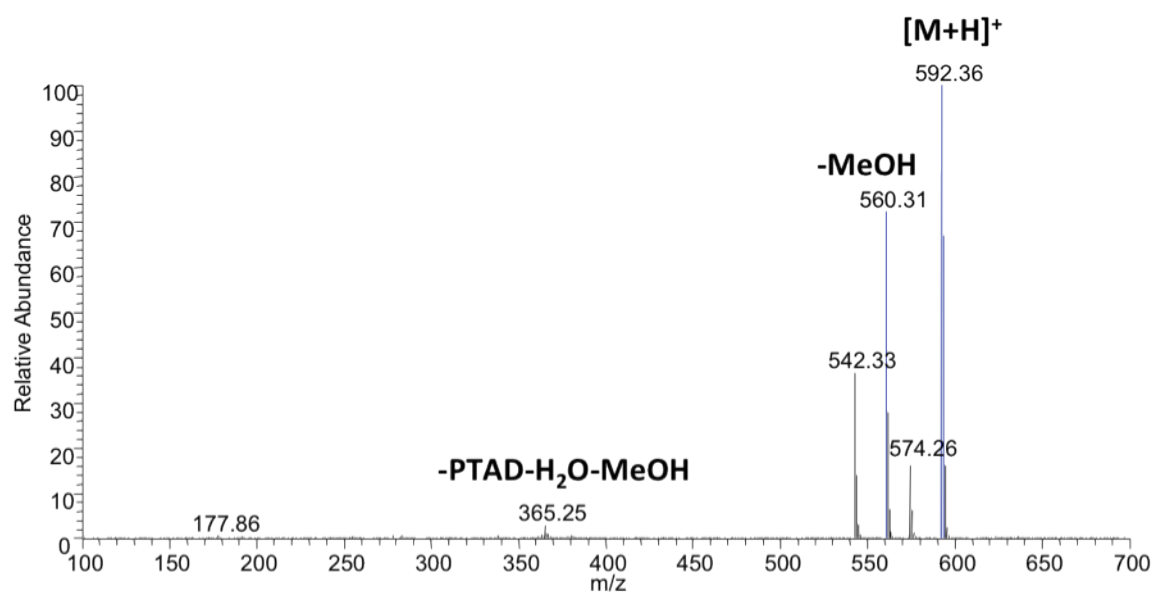

<sup>1</sup>H NMR:

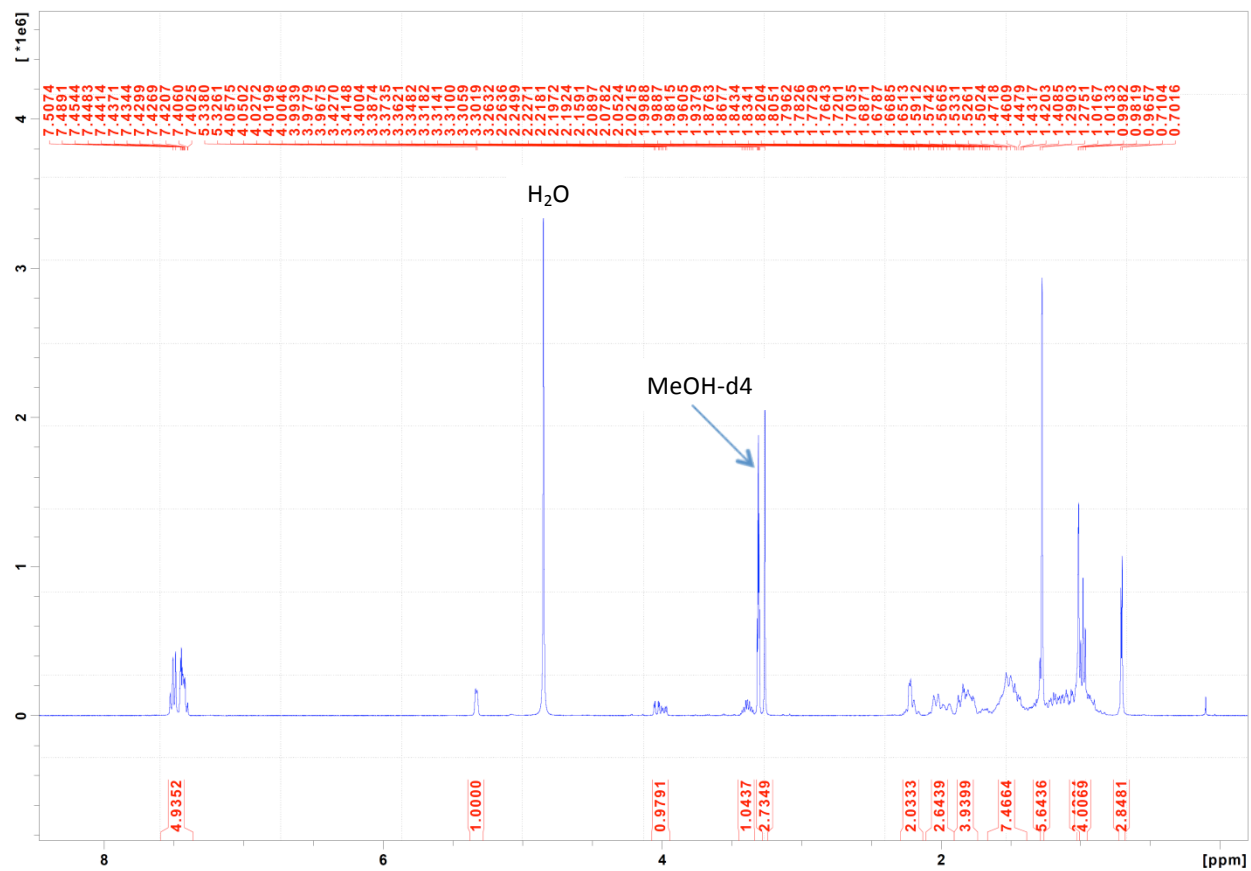

$^{13}\text{C}$  NMR:

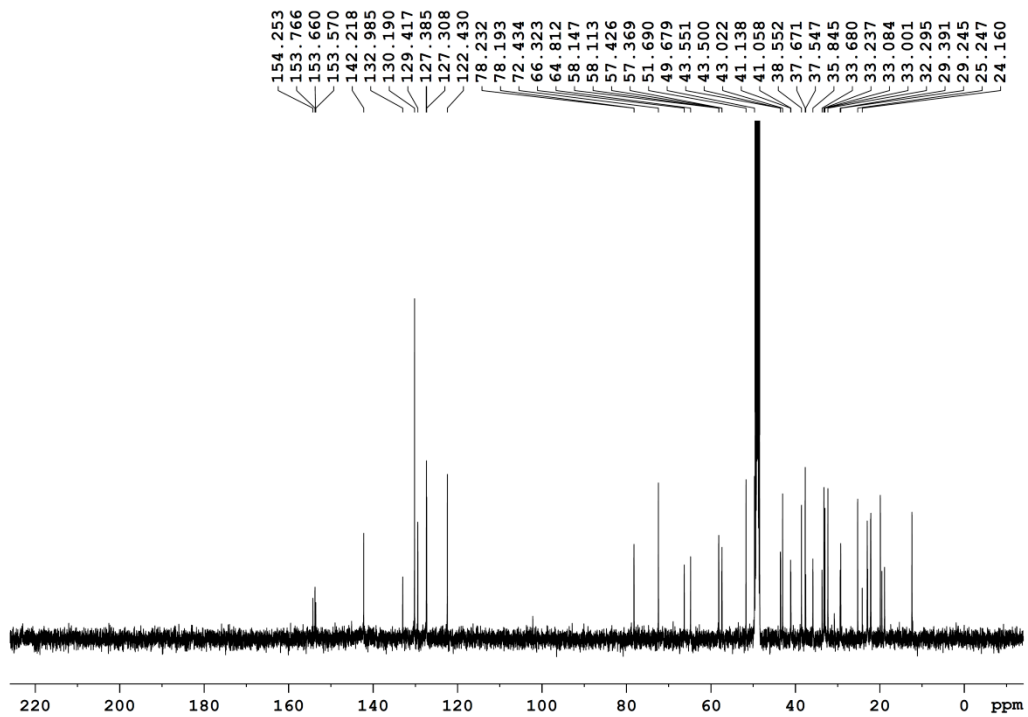

COSY:



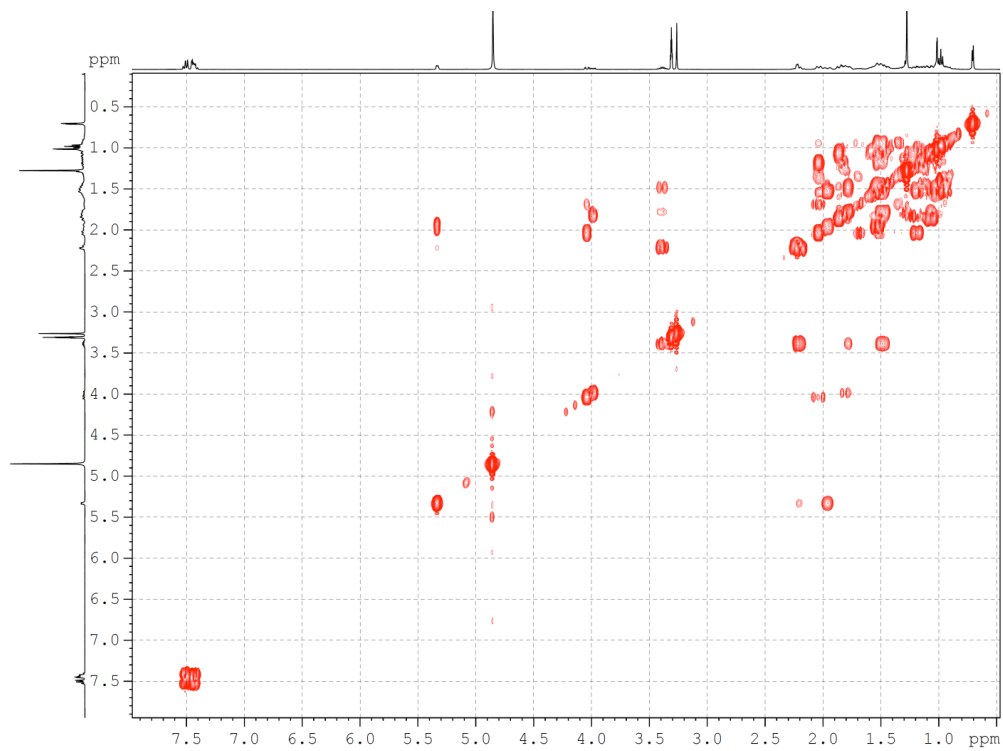

HMBC:

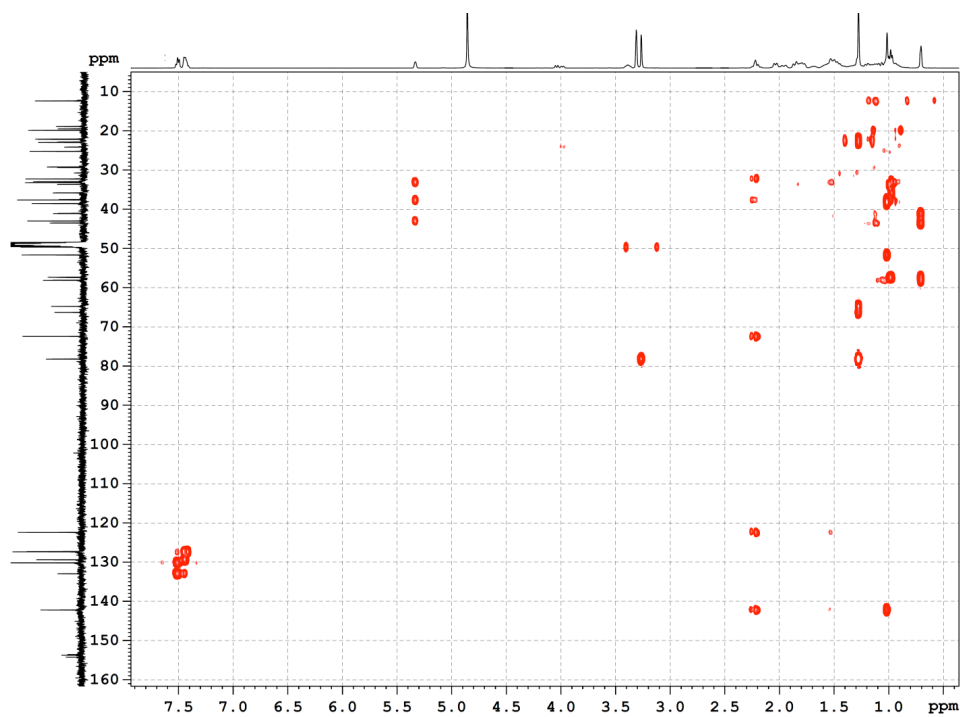

HSQC:

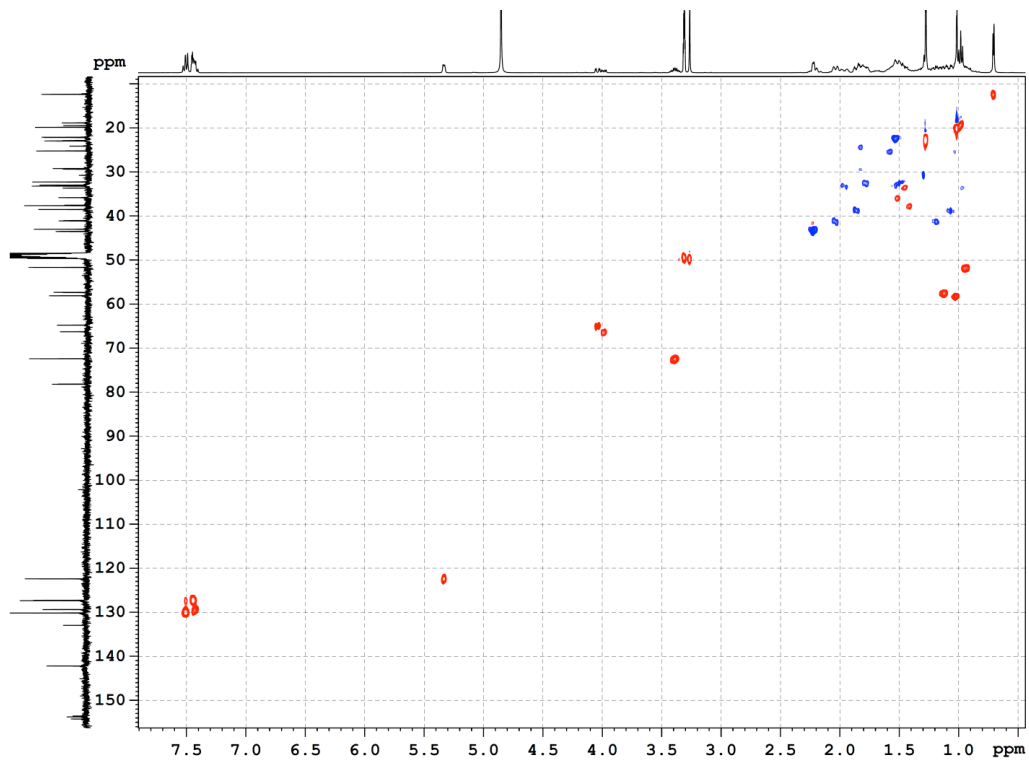

**Table S-1.** 7-DHC analysis in a specified number of control and *Dhcr7*-deficient Neuro2a cells with PTAD derivatization. Extracts from different numbers of cells (ranging from 125 to 500,000 cells, with 13 ng of *d*<sub>7</sub>-7DHC internal standard) were incubated with PTAD, respectively, and 10 μL of each reaction mixture was injected. a: blank sample, d0 impurity form *d*<sub>7</sub>-7DHC; b: hard interference of d0 impurity form *d*<sub>7</sub>-7DHC for less than 4,000 control cells.

| Number of cells | Control cell       |                  | <i>Dhcr7</i> -deficient Cell |                  |
|-----------------|--------------------|------------------|------------------------------|------------------|
|                 | 7DHC (ng)          | Desmosterol (ng) | 7DHC (ng)                    | Desmosterol (ng) |
| 0               | 0.018 <sup>a</sup> | --               | 0.019 <sup>a</sup>           | --               |
| 125             | 0.011 <sup>b</sup> | 0.21             | 0.25                         | 0.02             |
| 250             | 0.018 <sup>b</sup> | 0.38             | 0.53                         | 0.08             |
| 500             | 0.031 <sup>b</sup> | 0.73             | 1.09                         | 0.11             |
| 1,000           | 0.029 <sup>b</sup> | 1.49             | 1.92                         | 0.20             |
| 1,850           | 0.035 <sup>b</sup> | 3.27             | 4.59                         | 0.58             |
| 3,750           | 0.046 <sup>b</sup> | 6.70             | 8.83                         | 1.13             |
| 7,500           | 0.077              | 11.7             | 19.2                         | 2.25             |
| 15,000          | 0.15               | 29.1             | 41.6                         | 4.52             |
| 31,250          | 0.41               | 59.4             | 94.7                         | 9.05             |
| 6,2500          | 0.74               | 113.1            | 189.1                        | 18.2             |
| 125,000         | 1.33               | 217.5            | 386.1                        | 35.4             |
| 250,000         | 2.61               | 452.1            | 792.6                        | 76.6             |
| 500,000         | 3.43               | 646.3            | 1239.2                       | 121.8            |

**Figure S-4:** Correlations of 7-DHC and desmosterol with number of cells (ranging from 125 to 500,000 cells, with 13 ng of *d*<sub>7</sub>-7DHC internal standard). A, B: in control Neuro2a cells; C, D: in *Dhcr7*-deficient Neuro2a cells.

**A**

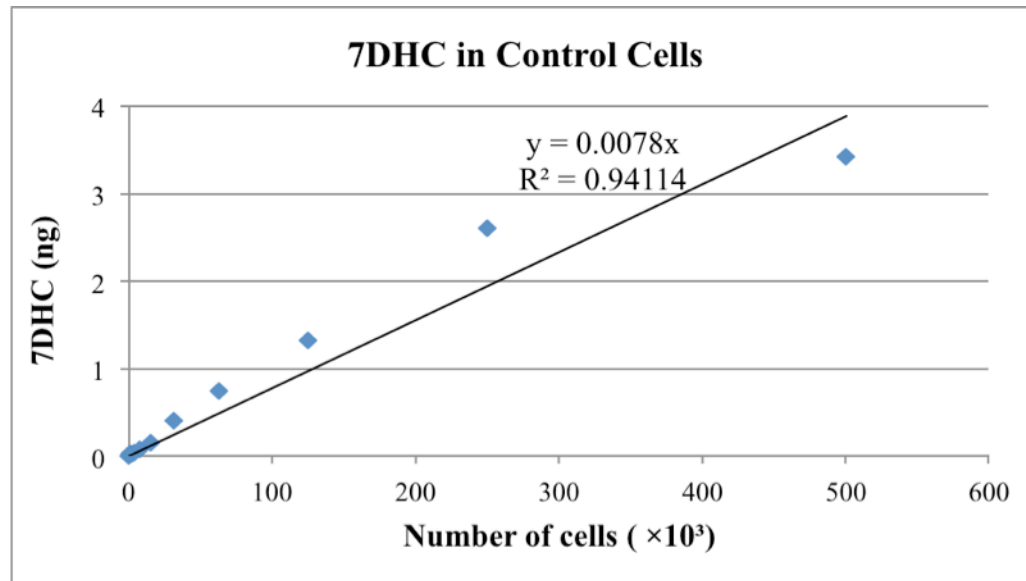

**B**

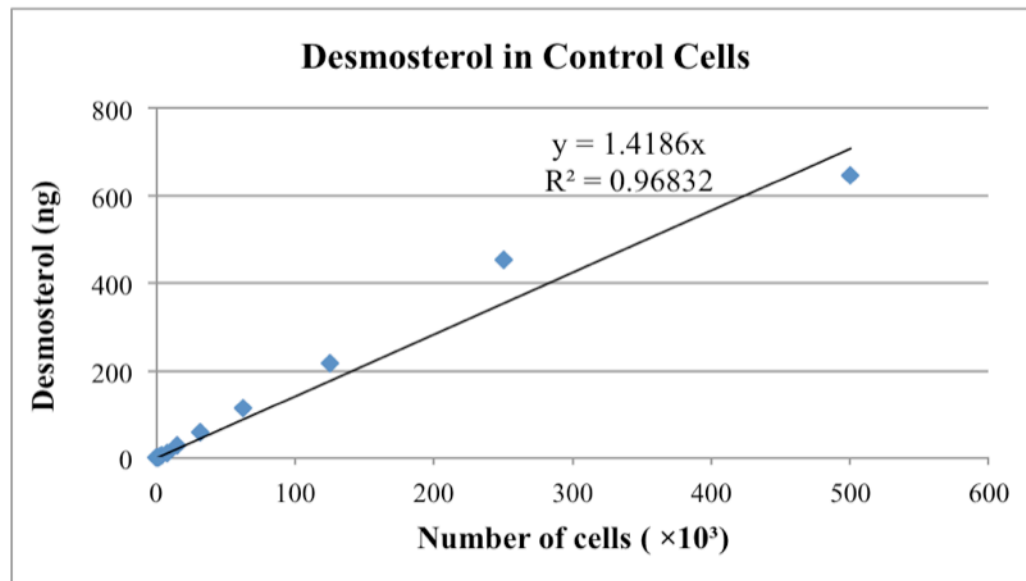

**C**

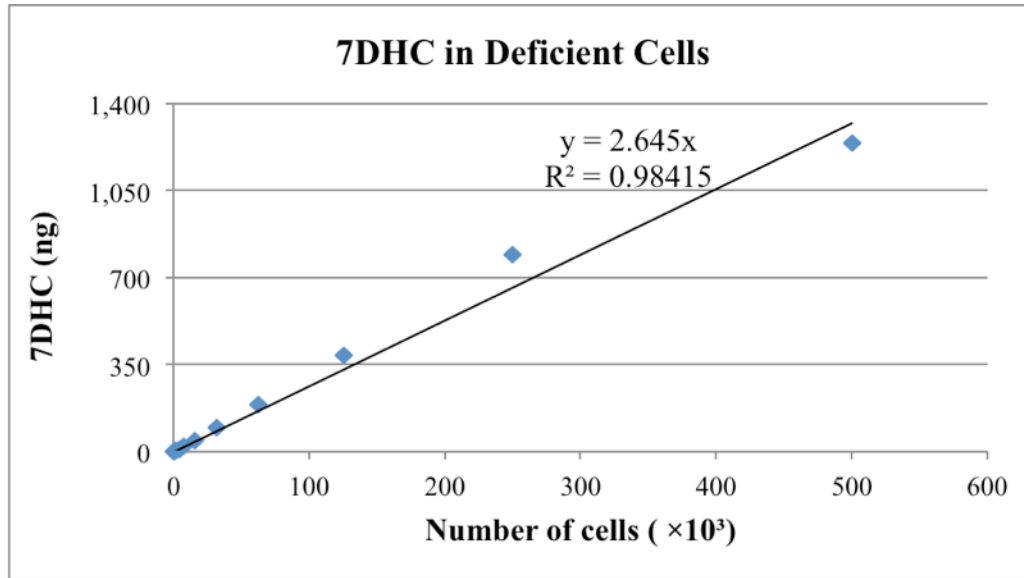

**D**

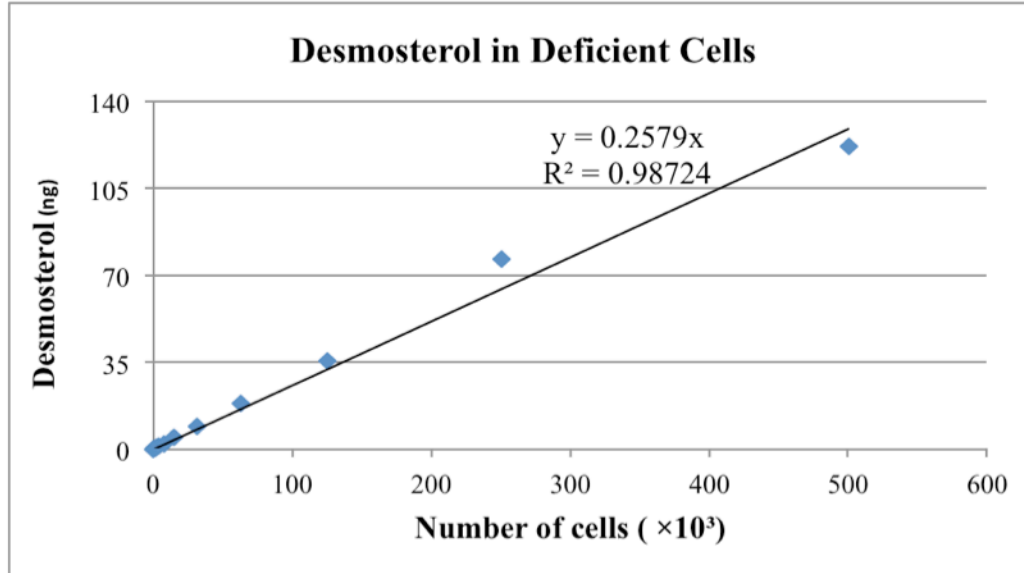

Supplement: supp_D043877_jlr.D043877-1.pdf [file supp_D043877_jlr.D043877-1.pdf]
